# Supplementary material
Source: PubMed Central journal article supplement (PMC6321769)
Supplement: NIHMS1511624-supplement-8.pdf [file NIHMS1511624-supplement-8.pdf]

SUPPLEMENTARY INFORMATION. Figures S1-7. Sequence maps redrawn from JBrowse screen captures for the remaining genes in this study are shown in a single figure. The first panel shows the high throughput tag vector screen for cis-regulatory activity in the marker BAC (cf. Table 1). The BAC insert ~2kb fragments are shown as an overlapping tiling array (back rectangles). Each 2kb fragment was incorporated in a tag vector and 129 of these vectors were injected into fertilized eggs. Transcribed tag DNA and genomically incorporated tag DNA for all vectors were measured simultaneously by Nanostring. The ratio of these values, which indicates the transcriptional activity driven by the sequence in each respective vector normalized to the amount of vector DNA incorporated, are shown at right in the histogram. 2kb fragments that are thus revealed to include active cis-regulatory modules are shown in red. Marginally expressing fragments are shown in purple and light blue. The second and third panels show various features mapped to the reference genome sequence at different approximate scales. The BAC insert is shown in green. The red line depicts the DNA sequence of the active fragment in the BAC insert. Deleted regions are shown in blue below it. Symbols identifying the deletions are the ones used in the test and tables. Vertical bars represent the position and number of ATAC-seq reads mapped. The position of the modified CIS-BP transcription factor binding sites are indicated in light green. Mutated sites are in orange.

Table S1. Coordinates of Hot Pieces and their deletions. The coordinates of the regulatory fragments identified for each gene mapped onto the reference genome assembly (v3.1) posted on Echinobase.org. Similarly the coordinates of the deletions used to show loss of function within the Hot Piece are indicated.

Table S2. qPCR primers. The primers used to measure the expression of each hot piece-tag fusion construct in this study. The primers are taken from the 13-tag set of Nam et al (2010).

Table S3. Microscopic observation of the fragment fusion constructs that expressed above an empirically determined threshold level from the Nanostring nCounter results. The cutoff is indicated for each gene set. For each fragment the transcript copies per construct and the microscopic observation is indicated. The microscopic observations were divided into 3 classes: 1) spatially correct; only expressed in primary mesenchyme cells; 2) low, the percentage of embryos observed was a minor fraction of the total; 3) negative: no fluorescent expression seen.

Table S1. Coordinates of Hot Pieces and their deletions

| Hot Piece ID | Scaffold    | Hot Piece Coordinates | Deletion ID | Deletions Coordinates            |
|--------------|-------------|-----------------------|-------------|----------------------------------|
| Colp3a_306   | Scaffold559 | 248133..246240        | D1/D2       | 247883..246534                   |
| Arhgap28_504 | Scaffold315 | :629818..627956       | D1<br>D2    | 628449..627956<br>629599..629100 |
| Astacin1_504 | Scaffold663 | 301994..300122        | D1/D2       | 301016..300174                   |
| Csrnp2_i10   | Scaffold931 | 191176..193382        | D2          | 192934..193382                   |
| Dri_507      | Scaffold48  | 160888..163027        | D2<br>D3    | 161909..162625<br>160888..161668 |
| Hypp2998_306 | Scaffold198 | 271304..273701        | D2          | 272044..273023                   |
| Mitf_506:    | Scaffold743 | 175745..177823        | D1<br>D2    | 175746..176099<br>176300..176599 |
| p58a_5021    | Scaffold107 | 248322..250994        | D1<br>D3    | 248923..249234<br>250500..250994 |

Table S2. qPCR primers

| <sup>1</sup> Tag No | Forward               | Reverse               | Amplicon | Hot piece         |
|---------------------|-----------------------|-----------------------|----------|-------------------|
| Tag 1               | agccactcagctccagaaaaa | acggtaattcgctgtgatgcc | 165bp    | Col3a_306 (A)     |
| Tag 2               | agagagccactcagctccag  | gtctgccagggtggtttacc  | 165bp    | Arhgap28_504 (B)  |
| Tag 3               | agccactcagctccagaaaaa | cgaaatatgccgctcagg    | 152bp    | Astacin1_504 (C ) |
| Tag 4               | agccactcagctccagaaaaa | cacttgtagcgacgatggc   | 165bp    | Csrnp2_i10 (D)    |
| Tag 7               | agagagccactcagctccag  | ctgCGgaccgtcgttatatgg | 168bp    | Dri_507 (E)       |
| Tag 8               | agccactcagctccagaaaa  | gcggcttgaatcgtctcc    | 161bp    | Hypp2998_306 (F)  |
| Tag 9               | agtccgctagaaggagagc   | agggttcagcaccacac     | 153bp    | Mitf_506 (G)      |
| Tag 10              | agccactcagctccagaaaa  | agatggctggcgtacgag    | 163bp    | p58a_5021 (H)     |

Control primers

|      |                      |                      |       |
|------|----------------------|----------------------|-------|
| GFP  | gctggccgaccattatcaac | acaaactccagcaggacat  | 141bp |
| UBIQ | cacaggcaagaccatcacac | gagagagtgcgaccatcctc | 147bp |
| FoxA | ccaaccgactccgtatcatc | cgtagctgctcatgctgtgt | 160bp |

<sup>1</sup>Tag numbers and primers are derived from 13 tag system previously reported (Nam et al, 2010).

Table S3. Microscopic observation of the fragment fusion constructs that expressed above an empirically determined threshold level from the Nanostring nCounter results. The cutoff is indicated for each gene set. For each fragment the transcript copies per construct and the microscopic observation is indicated. The microscopic observations were divided into 3 classes: 1) spatially correct; only expressed in primary mesenchyme cells; 2) low, the percentage of embryos observed was a minor fraction of the total; 3) negative: no fluorescent expression seen.

| Gene                     | Fragment                    | Nanostring<br>cDNA/gDNA | Result            |                   |
|--------------------------|-----------------------------|-------------------------|-------------------|-------------------|
| <b>Colp3a</b>            | Colp3a_306                  | 14.28                   | spatially correct |                   |
|                          | Colp3a_305                  | 2.47                    | negative          |                   |
|                          | cutoff=1.2<br>Colp3a_I07    | 2.04                    | negative          |                   |
| <b>Arhgap28</b>          | Arhgap28_507                | 167.17                  | low               |                   |
|                          | Arhgap28_3010               | 64.79                   | negative          |                   |
|                          | Arhgap28_303                | 61.04                   | negative          |                   |
|                          | Arhgap28_I04                | 18.93                   | negative          |                   |
|                          | Arhgap28_504                | 17.87                   | spatially correct |                   |
|                          | Arhgap28_3017               | 14.19                   | negative          |                   |
|                          | Arhgap28_302                | 11.36                   | negative          |                   |
|                          | Arhgap28_315                | 6.53                    | negative          |                   |
|                          | Arhgap28_316                | 5.83                    | negative          |                   |
|                          | cutoff=3.5<br>Arhgap28_505  | 5.58                    | negative          |                   |
|                          | <b>Astacin1</b>             | Astacin1_509            | 358.02            | negative          |
|                          |                             | Astacin1_504            | 24.55             | spatially correct |
| Astacin1_508_N           |                             | 15.41                   | negative          |                   |
| cutoff=4<br>Astacin1_507 |                             | 4.91                    | low               |                   |
| <b>Csrnp2</b>            | Csrnp2_i03                  | 105.63                  | ectopic           |                   |
|                          | Csrnp2_i10                  | 31.37                   | spatially correct |                   |
|                          | Csrnp2_i06                  | 20.47                   | low               |                   |
|                          | Csrnp2_i02                  | 16.94                   | low               |                   |
|                          | cutoff=3.5<br>Csrnp2_i04    | 13.11                   | low               |                   |
| <b>Dri</b>               | Dri_514a                    | 26.18                   | ectopic           |                   |
|                          | Dri_507a                    | 16.32                   | spatially correct |                   |
|                          | Dri_504                     | 9.02                    | negative          |                   |
|                          | Dri_502                     | 5.1                     | negative          |                   |
|                          | Dri_301                     | 7.8                     | negative          |                   |
|                          | cutoff=3.5<br>Dri_501       | 8.56                    | ectopic           |                   |
| <b>Hypp2998</b>          | Hypp2998_511                | 33.12                   | negative          |                   |
|                          | Hypp2998_306                | 20.01                   | spatially correct |                   |
|                          | cutoff=2.5<br>Hypp2998_io1B | 7.32                    | negative          |                   |

|             |           |       |                   |
|-------------|-----------|-------|-------------------|
| <b>MitF</b> | Mitf_506  | 4.64  | spatially correct |
|             | Mitf_505  | 3.57  | negative          |
| cutoff=2.5  | Mitf_514  | 2.65  | negative          |
| <b>p58a</b> | P58a l10  | 32.73 | ectopic           |
|             | P58a l09  | 5.12  | negative          |
| cutoff=2.5  | p58a 5021 | 3.52  | spatially correct |
