# Supplementary material
Source: PubMed Central journal article supplement (PMC6321769)

Figure S1. Arhgap28

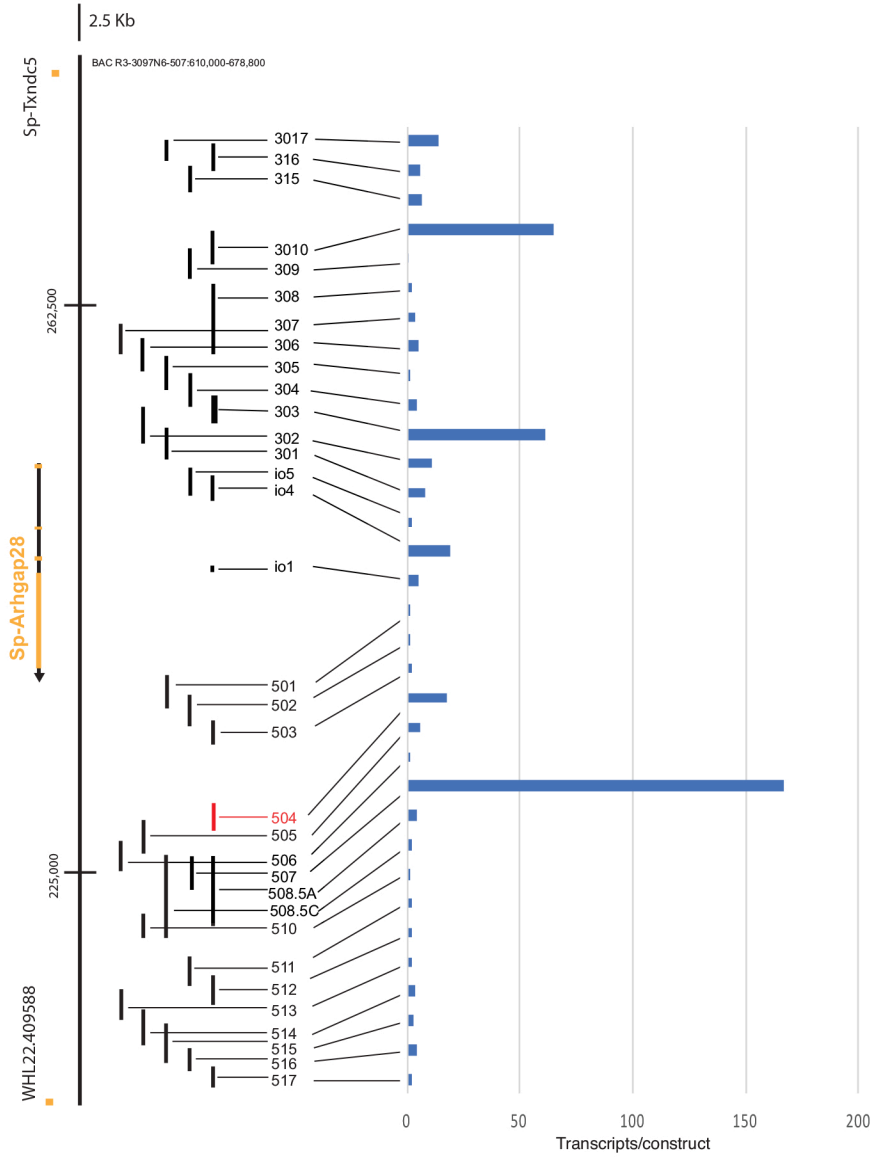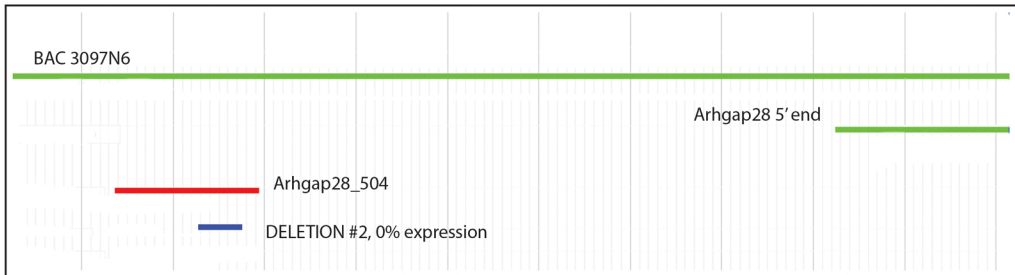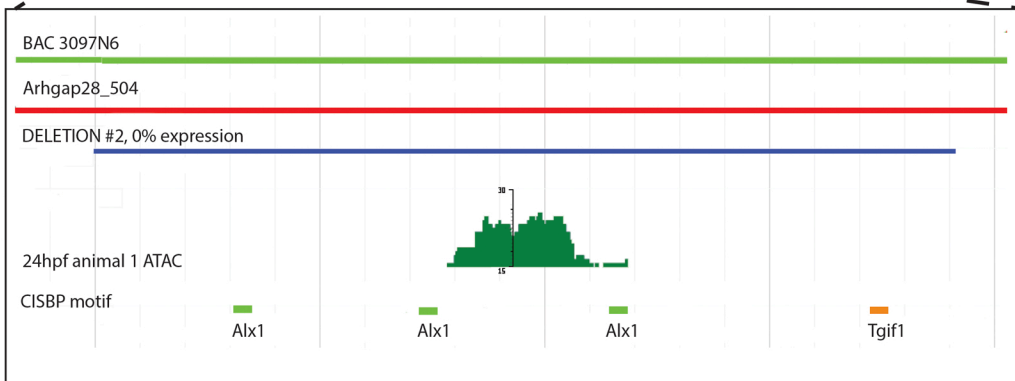

Supplement: NIHMS1511624-supplement-1.pdf [file NIHMS1511624-supplement-1.pdf]

Figure S2. Astacin1

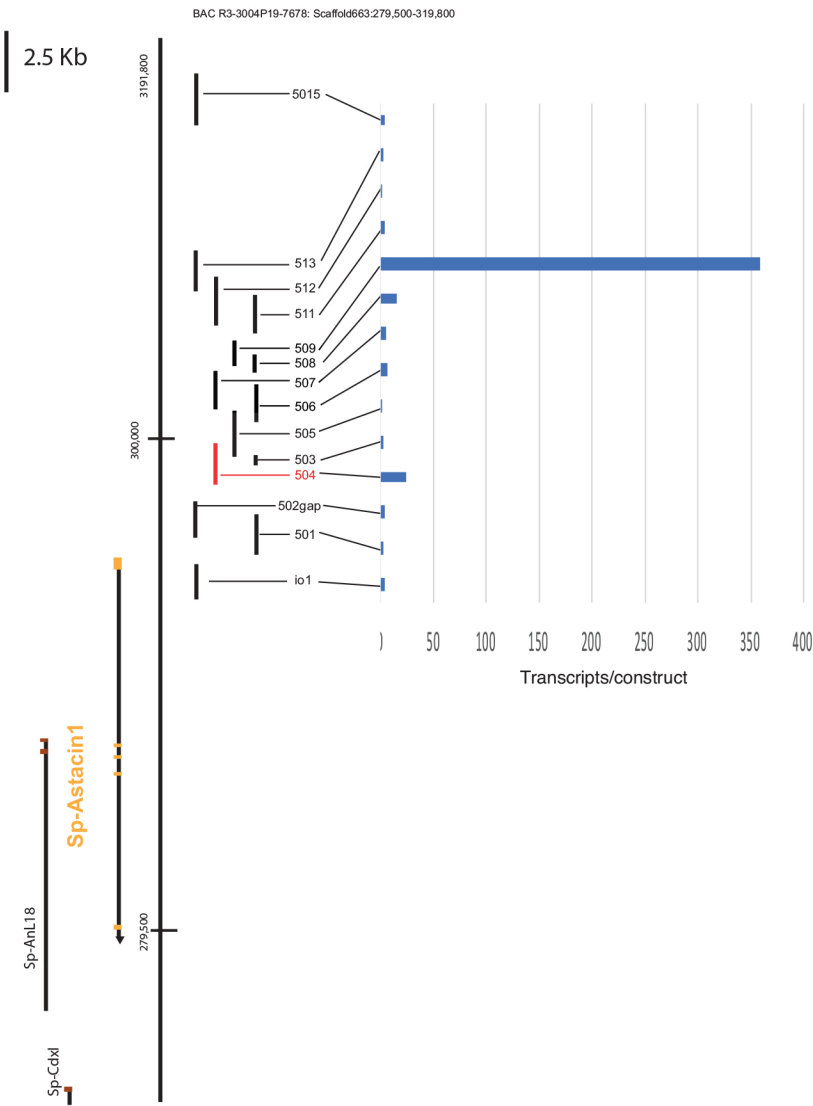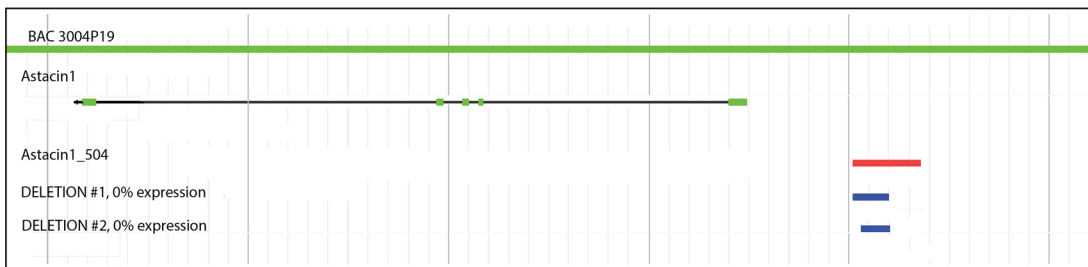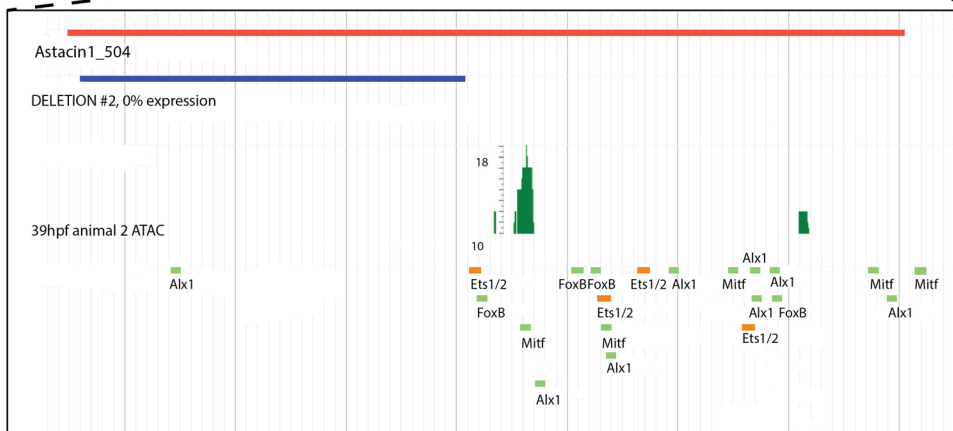

Supplement: NIHMS1511624-supplement-2.pdf [file NIHMS1511624-supplement-2.pdf]

Figure S3. *Csmp2*

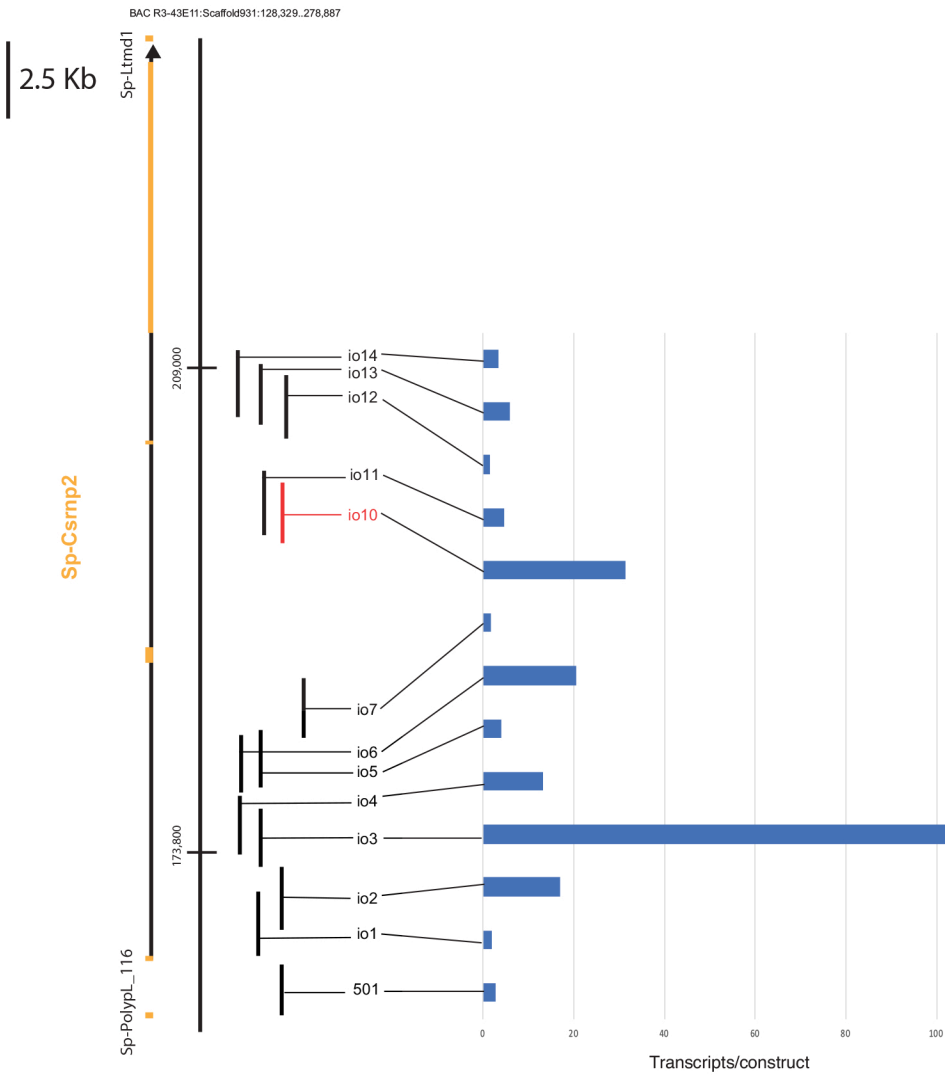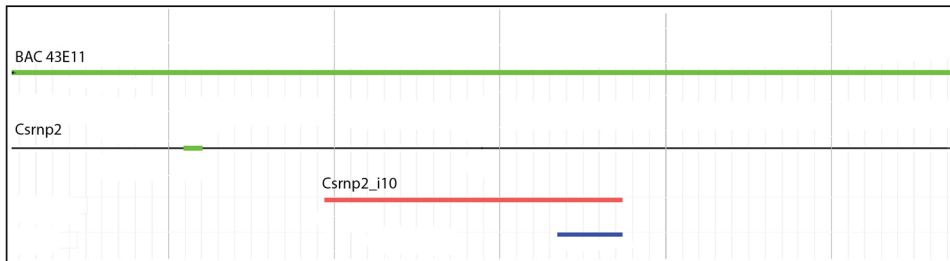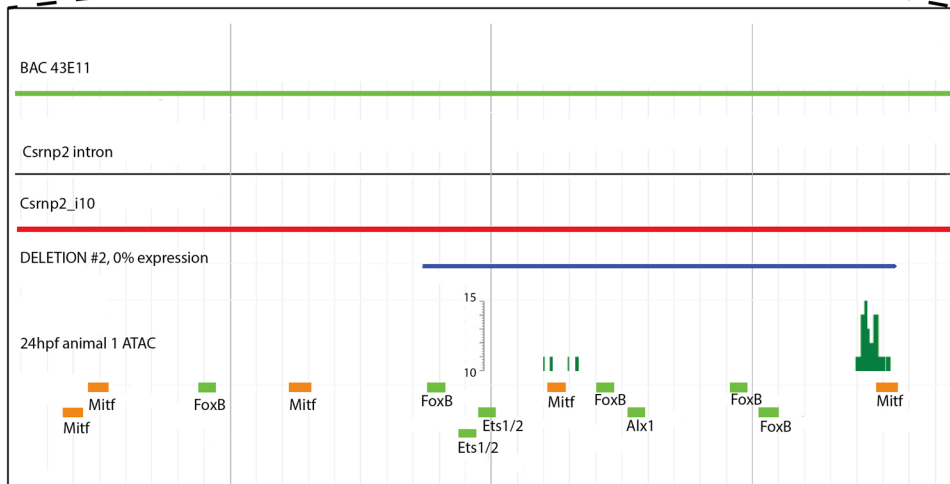

Supplement: NIHMS1511624-supplement-3.pdf [file NIHMS1511624-supplement-3.pdf]

Figure S4. Dri

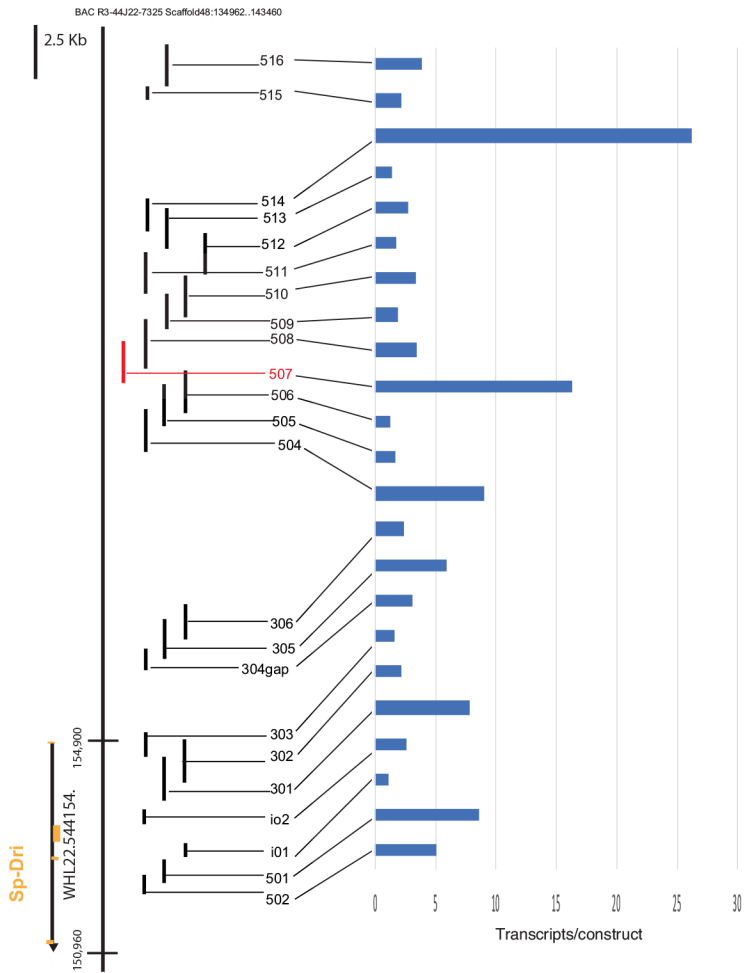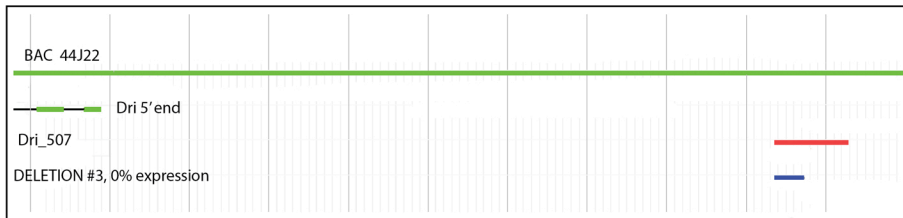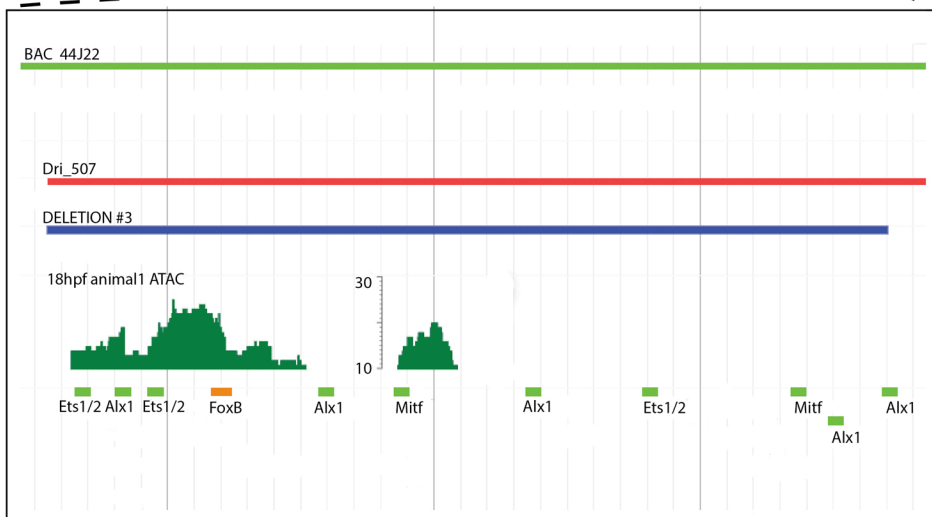

Supplement: NIHMS1511624-supplement-4.pdf [file NIHMS1511624-supplement-4.pdf]

Figure S5. Hypp2998

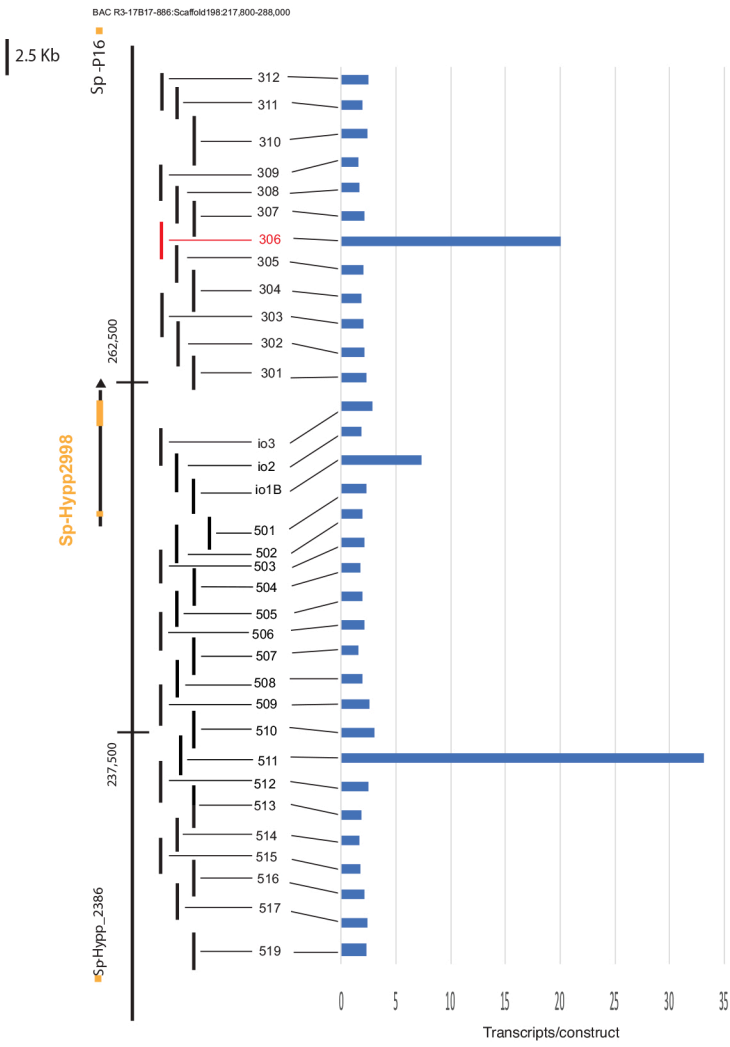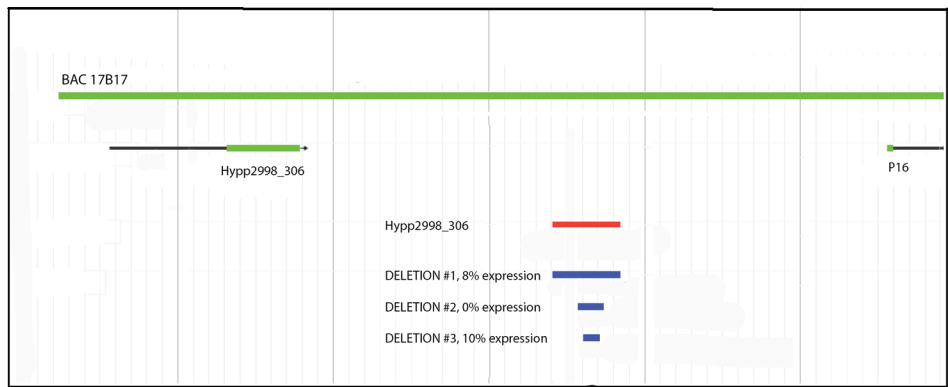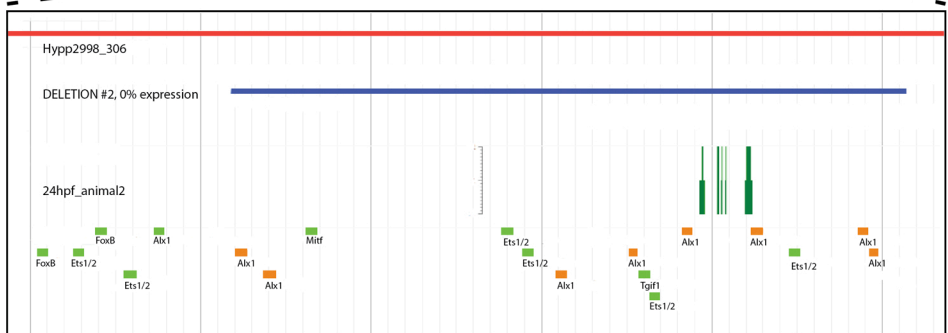

Supplement: NIHMS1511624-supplement-5.pdf [file NIHMS1511624-supplement-5.pdf]

# Figure S6. Mitf

BAC R3-1103B18-11439; Scaffold743:178923\_258822

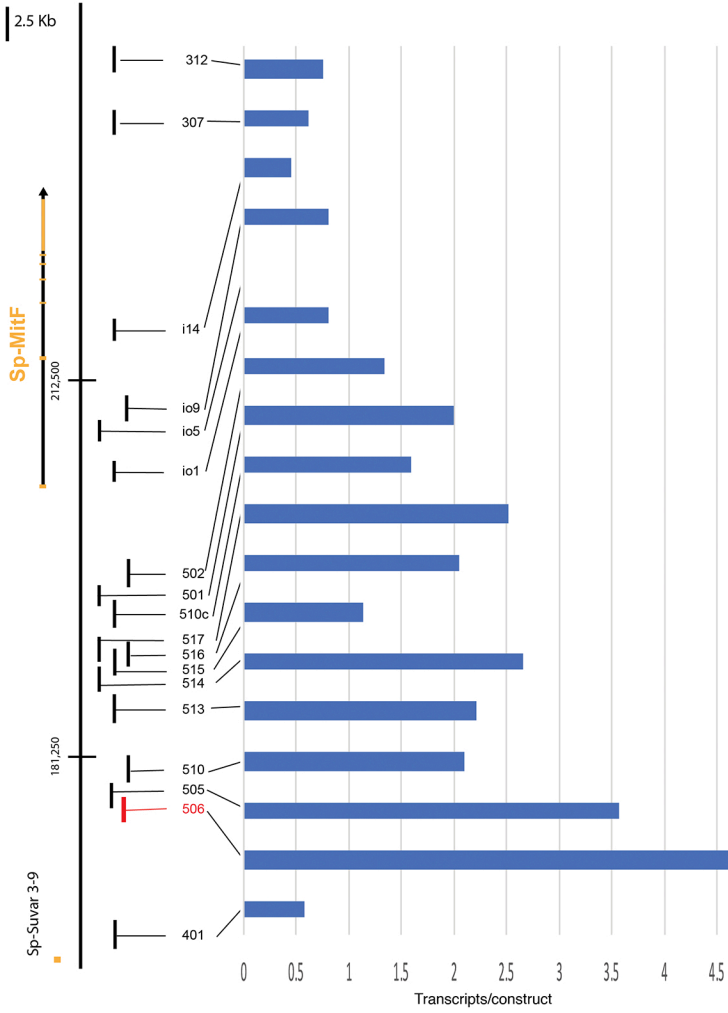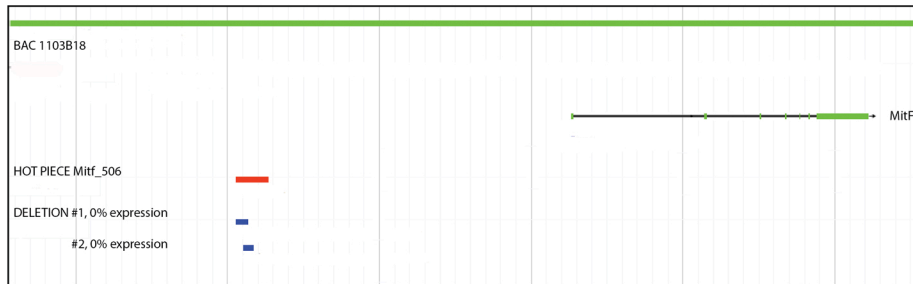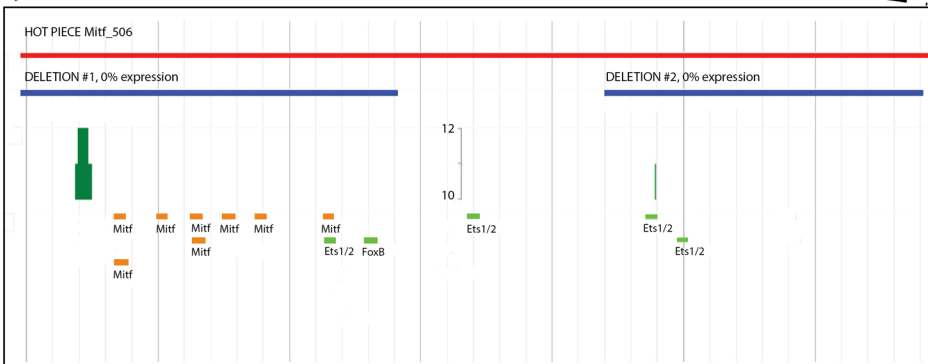

Supplement: NIHMS1511624-supplement-6.pdf [file NIHMS1511624-supplement-6.pdf]

Figure S7. p58a

BAC R3-3077H02-10775: Scaffold107:243787..288286

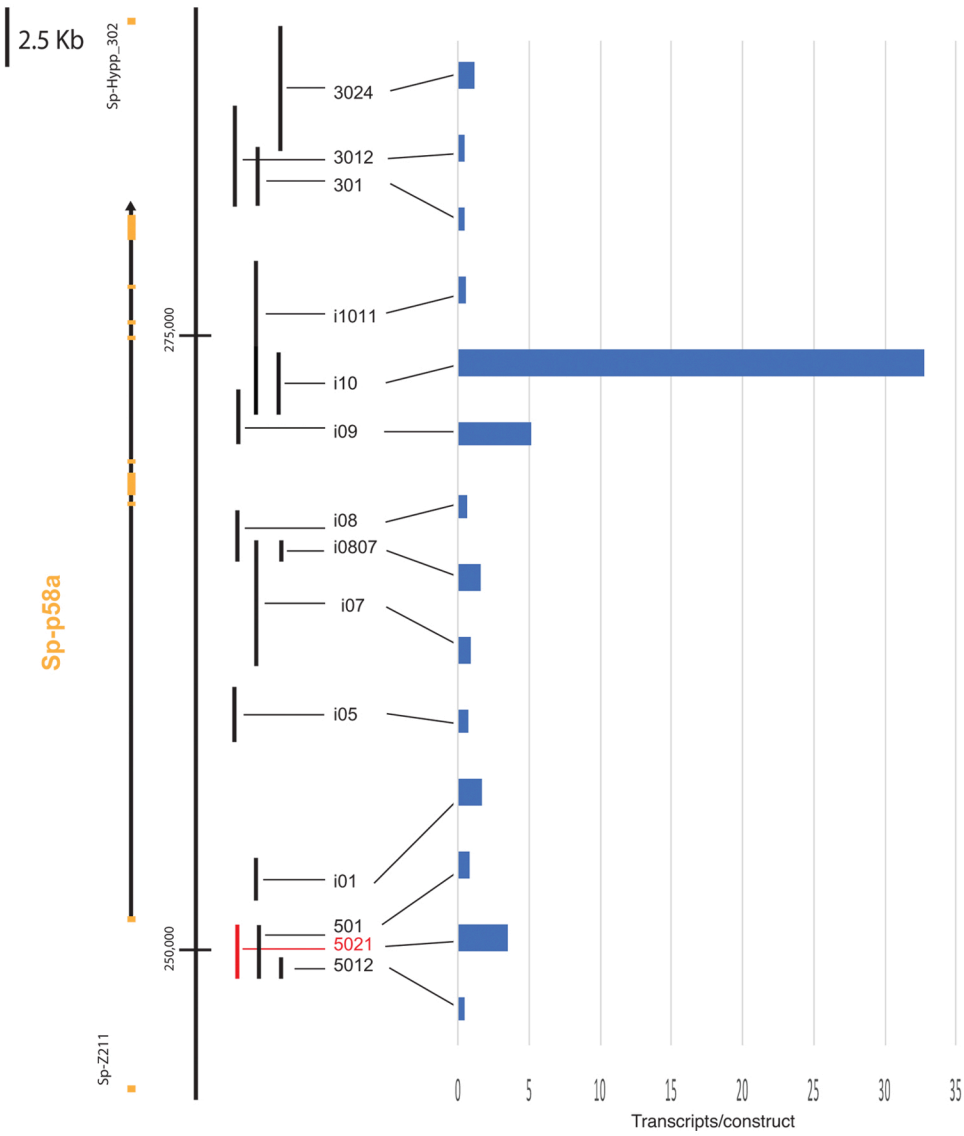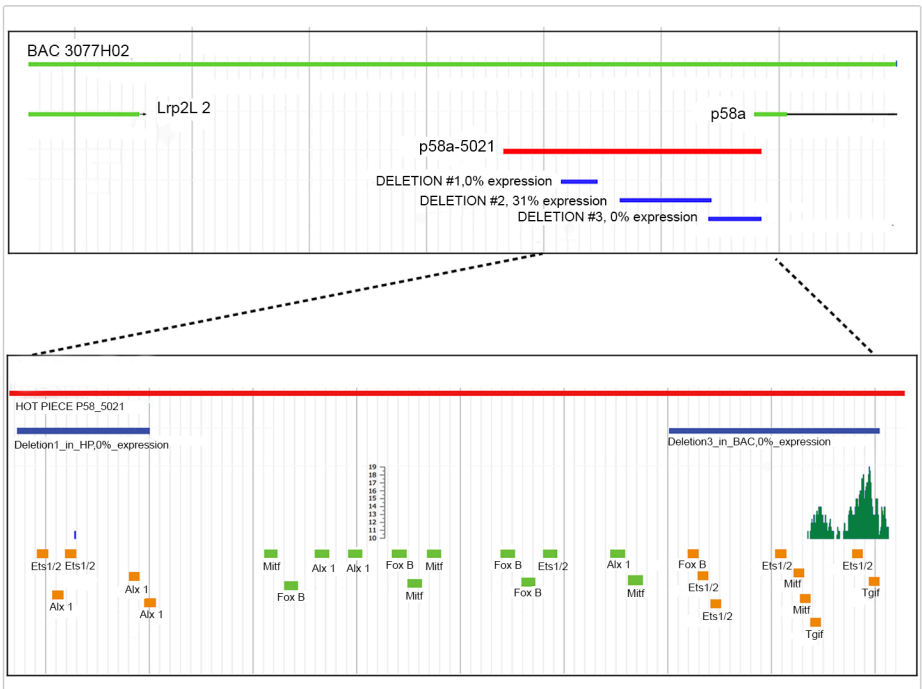

Supplement: NIHMS1511624-supplement-7.pdf [file NIHMS1511624-supplement-7.pdf]
